# Supplementary material
Source: publisher figshare collection journal article supplement (https://asha.figshare.com/ndownloader/files/39260030)
Supplement: Supplementary file 1 [file 39260030]

**Supplemental Material S1.** Table of comorbid conditions, categories, and rates of occurrence. Non-communication-related categories are indicated with an asterisk (\*). Total  $N = 375$ .

| Comorbid diagnosis                   | <i>n</i> | Category                           |
|--------------------------------------|----------|------------------------------------|
| Expressive language problems         | 359      | Expressive language impairment     |
| Receptive language delay             | 267      | Receptive language impairment      |
| Articulation deficit                 | 213      | Articulation deficit               |
| Nonspeech oral apraxia               | 132      | Nonspeech apraxia                  |
| Feeding difficulties                 | 124      | Feeding/swallowing problems        |
| Global developmental delay           | 124      | Cognitive impairment               |
| Hypotonia                            | 92       | Hypotonia                          |
| Motor delay                          | 92       | Motor delay                        |
| Severe phonological impairment       | 85       | Severe phonological disorder       |
| Vision problems                      | 64       | *Vision-related                    |
| ADHD                                 | 63       | Other communication-related        |
| Developmental delay                  | 50       | Cognitive impairment               |
| Seizure disorder NOS                 | 49       | Other communication-related        |
| Adenoidectomy                        | 45       | *Other (non-communication-related) |
| Tonsillectomy                        | 42       | *Other (non-communication-related) |
| Sleep disturbance                    | 39       | *Other (non-communication-related) |
| Behavior problems                    | 38       | Mood/behavioral challenges         |
| Craniofacial dysmorphism             | 34       | Craniofacial dysmorphology         |
| Cognitive delay                      | 32       | Cognitive impairment               |
| Autism/PDD-NOS                       | 31       | Autism spectrum disorder           |
| Velopharyngeal insufficiency         | 30       | Velopharyngeal problems            |
| Gastrointestinal problems            | 29       | *Other (non-communication-related) |
| Hearing loss                         | 29       | Hearing impairment                 |
| Cardiac issues NOS                   | 26       | *Cardiac-related                   |
| Dysarthria                           | 26       | Childhood dysarthria               |
| Spells                               | 25       | Other communication-related        |
| Gastroesophageal reflux disorder     | 23       | Feeding/swallowing problems        |
| Anxiety                              | 22       | Mood/behavioral challenges         |
| Chromosome abnormality NOS           | 20       | Genetic syndrome                   |
| Intellectual disability              | 20       | Cognitive impairment               |
| Learning disability NOS              | 20       | Cognitive impairment               |
| Prematurity                          | 20       | *Other (non-communication-related) |
| Hypernasal                           | 18       | Childhood dysarthria               |
| Digeorge syndrome (22q11.2 deletion) | 16       | Genetic syndrome                   |
| Failure to thrive                    | 16       | *Other (non-communication-related) |
| Cognitive impairment                 | 15       | Cognitive impairment               |
| Down syndrome (trisomy 21)           | 15       | Genetic syndrome                   |
| Cardiac atrial septal defect         | 13       | *Cardiac-related                   |

|                                                             |    |                                    |
|-------------------------------------------------------------|----|------------------------------------|
| Microcephaly                                                | 13 | Other communication-related        |
| Sleep apnea                                                 | 12 | *Other (non-communication-related) |
| Urology problems                                            | 12 | *Other (non-communication-related) |
| Epilepsy                                                    | 11 | Other communication-related        |
| Strabismus                                                  | 11 | *Vision-related                    |
| Attention concerns                                          | 9  | Other communication-related        |
| Endocrine problems                                          | 9  | *Other (non-communication-related) |
| Pulmonary problems                                          | 9  | *Other (non-communication-related) |
| Allergies                                                   | 8  | *Other (non-communication-related) |
| Cleft palate                                                | 8  | Craniofacial dysmorphology         |
| Dyslexia                                                    | 8  | Literacy problems                  |
| Dysphagia                                                   | 8  | Feeding/swallowing problems        |
| Muenke syndrome ( <i>FGFR3</i> pathogenic variant c.749C>G) | 8  | Genetic syndrome                   |
| Sleep disordered breathing                                  | 8  | *Other (non-communication-related) |
| Cardiac ventricular septic deficit                          | 8  | *Cardiac-related                   |
| Global apraxia                                              | 7  | *Other (non-communication-related) |
| Hydrocephalus                                               | 7  | *Other (non-communication-related) |
| Iron deficiency                                             | 7  | *Other (non-communication-related) |
| Reflux                                                      | 7  | Craniofacial dysmorphology         |
| Submucous cleft palate                                      | 7  | *Other (non-communication-related) |
| Torticollis                                                 | 7  | Other communication-related        |
| Neurofibromatosis                                           | 6  | Other communication-related        |
| Asthma                                                      | 6  | *Other (non-communication-related) |
| Cochlear implant                                            | 6  | Hearing impairment                 |
| Frenulectomy                                                | 6  | *Other (non-communication-related) |
| Joint hypermobility                                         | 6  | *Other (non-communication-related) |
| Mood disorder NOS                                           | 6  | Mood/behavioral challenges         |
| Motor apraxia                                               | 6  | Nonspeech apraxia                  |
| Plagiocephaly                                               | 6  | *Other (non-communication-related) |
| Static encephalopathy                                       | 5  | *Other (non-communication-related) |
| Angelman syndrome (15q11.2 microdeletion)                   | 5  | Genetic syndrome                   |
| Astigmatism                                                 | 5  | *Vision-related                    |
| Auditory neuropathy                                         | 5  | Hearing impairment                 |
| Cardiac surgery                                             | 5  | *Cardiac-related                   |
| Cerebral palsy                                              | 5  | Other communication-related        |
| Chiari malformation                                         | 5  | *Other (non-communication-related) |
| Craniosynostosis                                            | 5  | *Other (non-communication-related) |
| Disruptive behavior                                         | 5  | Mood/behavioral challenges         |
| Mild right hemiparesis                                      | 5  | Neo- or perinatal stroke           |
| Febrile seizure                                             | 4  | *Other (non-communication-related) |
| 16p11.2 deletion                                            | 4  | Genetic syndrome                   |

|                                     |   |                                    |
|-------------------------------------|---|------------------------------------|
| Ataxia                              | 4 | Cerebellar dysfunction             |
| Bifid uvula                         | 4 | Craniofacial dysmorphology         |
| Bronchomalacia                      | 4 | Craniofacial dysmorphology         |
| Chromosomal anomaly NOS             | 4 | Genetic disorder                   |
| Cleft lip                           | 4 | Craniofacial dysmorphology         |
| Developmental coordination disorder | 4 | Other communication-related        |
| Esotropia                           | 4 | *Other (non-communication-related) |
| Hypothyroidism                      | 4 | *Other (non-communication-related) |
| Kidney problems                     | 4 | *Other (non-communication-related) |
| Laryngomalacia                      | 4 | Craniofacial dysmorphology         |
| Obsessional-compulsive disorder     | 4 | Mood/behavioral challenges         |
| Ocular motor apraxia                | 4 | Nonspeech apraxia                  |
| Periventricular leukomalacia        | 4 | *Other (non-communication-related) |
| Schizencephaly                      | 4 | Other communication-related        |
| Sebaceous nevi syndrome             | 4 | *Other (non-communication-related) |
| Sensory integration disorder        | 4 | Other communication-related        |
| Spasticity                          | 4 | Other communication-related        |
| Subglottic stenosis                 | 4 | Craniofacial dysmorphology         |
| Tracheomalacia                      | 4 | *Other (non-communication-related) |
| Tremor                              | 4 | *Other (non-communication-related) |
| Hearing aids                        | 4 | Hearing impairment                 |
| Velopharyngeal mislearning          | 4 | Nonspeech apraxia                  |
| 1p36 deletion                       | 3 | Genetic syndrome                   |
| Atypical pragmatics                 | 3 | Autism spectrum disorder           |
| Chromosomal deletion NOS            | 3 | Genetic syndrome                   |
| Cortical dysplasia                  | 3 | *Other (non-communication-related) |
| Dysphonia                           | 3 | Vocal problems                     |
| Executive functioning problems      | 3 | Other communication-related        |
| Hyponasal resonance                 | 3 | Childhood dysarthria               |
| Hypoxic-ischemic encephalopathy     | 3 | Other communication-related        |
| Intrauterine growth retardation     | 3 | Other communication-related        |
| Mitochondrial disorder NOS          | 3 | *Other (non-communication-related) |
| Prader-Willi (15q11.2-q13 deletion) | 3 | Genetic syndrome                   |
| Syndactyly                          | 3 | *Other (non-communication-related) |
| Microdeletion on chromosome 8       | 2 | Genetic syndrome                   |
| Supraventricular tachycardia        | 2 | *Other (non-communication-related) |
| Complex congenital heart disease    | 2 | *Cardiac-related                   |
| Phelan-McDermid (22q13.3 deletion)  | 2 | Genetic syndrome                   |
| Acute myeloid leukemia              | 2 | *Other (non-communication-related) |
| Aphasia                             | 2 | Neo-or perinatal stroke            |
| Atypical prosody                    | 2 | Autism spectrum disorder           |
| Carnitine deficiency                | 2 | *Other (non-communication-related) |

|                                                                      |   |                                    |
|----------------------------------------------------------------------|---|------------------------------------|
| Celiac disease                                                       | 2 | *Other (non-communication-related) |
| Cerebellar ataxia                                                    | 2 | Cerebellar dysfunction             |
| Cerebellar hypoplasia                                                | 2 | Cerebellar dysfunction             |
| Congenital anomalies NOS                                             | 2 | *Other (non-communication-related) |
| Delayed brain myelination                                            | 2 | Other communication-related        |
| Deletion of 7q31.2                                                   | 2 | Genetic syndrome                   |
| Duane syndrome ( <i>CHN1</i> pathogenic variant)                     | 2 | Genetic syndrome                   |
| Exotropia                                                            | 2 | *Other (non-communication-related) |
| Eye problems                                                         | 2 | *Vision-related                    |
| Fluency                                                              | 2 | Dysfluency                         |
| Hoarse voice                                                         | 2 | Vocal problems                     |
| Hyperbilirubinemia                                                   | 2 | *Other (non-communication-related) |
| Hypertrichosis                                                       | 2 | *Other (non-communication-related) |
| Hypertrophic cardiomyopathy                                          | 2 | *Cardiac-related                   |
| Impaired social interaction                                          | 2 | Autism spectrum disorder           |
| Metabolic disorder NOS                                               | 2 | *Other (non-communication-related) |
| Micrognathia                                                         | 2 | Craniofacial dysmorphology         |
| Nasal regurgitation                                                  | 2 | Feeding/swallowing problems        |
| Oppositional disorder                                                | 2 | Mood/behavioral challenges         |
| Parkinsonism                                                         | 2 | *Other (non-communication-related) |
| Polydactyly                                                          | 2 | *Other (non-communication-related) |
| Posterior fossa cyst occupying a portion of the right cerebellum     | 2 | Cerebellar dysfunction             |
| Pyloric stenosis                                                     | 2 | *Other (non-communication-related) |
| Scoliosis                                                            | 2 | *Other (non-communication-related) |
| Selective mutism                                                     | 2 | Other communication-related        |
| Spina bifida                                                         | 2 | *Other (non-communication-related) |
| Tracheostomy                                                         | 2 | Other communication-related        |
| Worster-Drought syndrome                                             | 2 | form of cerebral palsy             |
| Bilateral temporal subarachnoid cyst with ventriculoperitoneal shunt | 1 | *Other (non-communication-related) |
| Hypogenesis of the corpus callosum with a lipoma                     | 1 | Other communication-related        |
| Triplication of a 1.6-megabase segment in chromosome 4               | 1 | Genetic syndrome                   |
| 17p11.2 duplication                                                  | 1 | Genetic syndrome                   |
| Koolen de Vries (17q21.31 deletion)                                  | 1 | Genetic syndrome                   |
| 2q13 microdeletion syndrome                                          | 1 | Genetic syndrome                   |
| 46,XX,dup15q13.2-q13.3                                               | 1 | Genetic syndrome                   |
| 47 XXY karyotype                                                     | 1 | Genetic syndrome                   |
| Alcohol exposure in utero                                            | 1 | Other communication-related        |
| Arachnoid cyst                                                       | 1 | Other communication-related        |

|                                                     |   |                                    |
|-----------------------------------------------------|---|------------------------------------|
| Aural atresia                                       | 1 | Hearing impairment                 |
| Behavioral feeding disorder                         | 1 | Mood/behavioral challenges         |
| Benign familial megalencephaly                      | 1 | *Other (non-communication-related) |
| Bilateral craniosynostosis and multiple hemangiomas | 1 | *Other (non-communication-related) |
| Bilateral microtia                                  | 1 | Hearing impairment                 |
| Bilateral polymicrogyria                            | 1 | *Other (non-communication-related) |
| Bipolar disorder                                    | 1 | Mood/behavioral challenges         |
| Borderline prolonged QT                             | 1 | *Cardiac-related                   |
| Cardiac failure                                     | 1 | *Cardiac-related                   |
| Cardiomyopathy                                      | 1 | *Cardiac-related                   |
| Cerebellar atrophy                                  | 1 | Cerebellar dysfunction             |
| CHARGE (CHD7 mutation)                              | 1 | Genetic syndrome                   |
| Chromosomal deletion of 2q33.1 to 33.3              | 1 | Genetic syndrome                   |
| Chromosome 13 anomaly                               | 1 | Genetic syndrome                   |
| Chromosome deletion 4q35.5                          | 1 | Genetic syndrome                   |
| Chromosome variant 6p24.1                           | 1 | Genetic syndrome                   |
| Congenital cataracts                                | 1 | *Vision-related                    |
| Congenital cytomegalovirus infection                | 1 | Other communication-related        |
| Cystic encephalomalacia with associated gliosis     | 1 | *Other (non-communication-related) |
| Cystic fibrosis                                     | 1 | *Other (non-communication-related) |
| Deletion on chromosome 11                           | 1 | Genetic syndrome                   |
| Detached retina                                     | 1 | *Vision-related                    |
| Distal arthrogryposis type V                        | 1 | *Other (non-communication-related) |
| Dysplasia                                           | 1 | *Other (non-communication-related) |
| Emotional lability                                  | 1 | Mood/behavioral challenges         |
| FOXP2 pathogenic variant                            | 1 | Genetic syndrome                   |
| Galactosemia                                        | 1 | Genetic syndrome                   |
| Gene mutation NOS                                   | 1 | Genetic syndrome                   |
| Goldenhar syndrome (11q13 mutation)                 | 1 | Genetic syndrome                   |
| Hemihypertrophy                                     | 1 | *Other (non-communication-related) |
| Hemi-megalencephaly                                 | 1 | Other communication-related        |
| HLA-B27 positive                                    | 1 | *Other (non-communication-related) |
| Holoprosencephaly                                   | 1 | Other communication-related        |
| Hyperacusis                                         | 1 | Hearing-related                    |
| Hyperglycemia                                       | 1 | *Other (non-communication-related) |
| Intracranial hemorrhage                             | 1 | Neo- or perinatal stroke           |
| Isochromosome 18p                                   | 1 | Genetic syndrome                   |
| Joubert syndrome ( <i>OFD1</i> pathogenic variant)  | 1 | Genetic syndrome                   |
| Juvenile dermatomyositis                            | 1 | *Other (non-communication-related) |
| Kidney dysplasia                                    | 1 | *Other (non-communication-related) |
| Kleefstra syndrome (9q34.3 deletion)                | 1 | Genetic syndrome                   |

|                                                                    |   |                                    |
|--------------------------------------------------------------------|---|------------------------------------|
| Klinefelter syndrome (47, xxy)                                     | 1 | Genetic syndrome                   |
| Landau-Kleffner Syndrome ( <i>GRIN2A</i> pathogenic variant)       | 1 | Genetic syndrome                   |
| Malocclusion                                                       | 1 | Craniofacial dysmorphology         |
| MECP2 gene mutation                                                | 1 | Genetic syndrome                   |
| Methylmalonic acidemia                                             | 1 | *Other (non-communication-related) |
| Micro-duplication of 17q12                                         | 1 | Genetic syndrome                   |
| Microdeletion in chromosome 1q21.1                                 | 1 | Genetic syndrome                   |
| Microphthalmia                                                     | 1 | *Vision-related                    |
| Mitochondrial complex I deficiency                                 | 1 | *Other (non-communication-related) |
| Mosaic methylation defect                                          | 1 | *Other (non-communication-related) |
| Mosaic trisomy 9                                                   | 1 | Genetic syndrome                   |
| Motor tics                                                         | 1 | Other communication-related        |
| Muscle weakness                                                    | 1 | Hypotonia                          |
| Nasal emission                                                     | 1 | Velopharyngeal problems            |
| Neonatal stroke and seizures                                       | 1 | Neo- or perinatal stroke           |
| Neurocutaneous melanosis                                           | 1 | *Other (non-communication-related) |
| Partial seizure disorder                                           | 1 | Other communication-related        |
| Periodic fever syndrome                                            | 1 | *Other (non-communication-related) |
| Phoneme specific nasal emission                                    | 1 | Velopharyngeal problems            |
| Pigmentary retinopathy                                             | 1 | *Vision-related                    |
| Pilocytic astrocytoma                                              | 1 | Other communication-related        |
| Polysubstance exposure in utero                                    | 1 | *Other (non-communication-related) |
| Pulmonary atresia                                                  | 1 | *Other (non-communication-related) |
| Rheumatologic disease                                              | 1 | *Other (non-communication-related) |
| Ring chromosome 16 syndrome                                        | 1 | Genetic syndrome                   |
| Rubinstein-Taybi syndrome                                          | 1 | Genetic syndrome                   |
| Sleep myoclonus                                                    | 1 | *Other (non-communication-related) |
| Stridor                                                            | 1 | Vocal problems                     |
| Subglottic hemangioma                                              | 1 | Other communication-related        |
| Tongue tie                                                         | 1 | *Other (non-communication-related) |
| Tracheobronchomalacia                                              | 1 | *Other (non-communication-related) |
| Trisomy 10                                                         | 1 | Genetic syndrome                   |
| Trisomy 16                                                         | 1 | Genetic syndrome                   |
| Usher syndrome type 1                                              | 1 | Genetic syndrome                   |
| Vocal abuse                                                        | 1 | Vocal problems                     |
| Vocal fold paralysis                                               | 1 | Vocal problems                     |
| Wolff-Parkinson-White syndrome ( <i>PRKAG2</i> pathogenic variant) | 1 | Genetic syndrome                   |
| X-linked cognitive disability                                      | 1 | Cognitive impairment               |
| X-Y chromosome translocation                                       | 1 | Genetic syndrome                   |
| XXX aneuploidy                                                     | 1 | Genetic syndrome                   |
